# Supplementary material for: Identification of Genes Associated with Prognosis and Immunotherapy Prediction in Triple-Negative Breast Cancer via M1/M2 Macrophage Ratio
Source: MDPI journal article supplement (doi:10.3390/medicina59071285), 2023-07-11
Supplement: s1 [file s1]

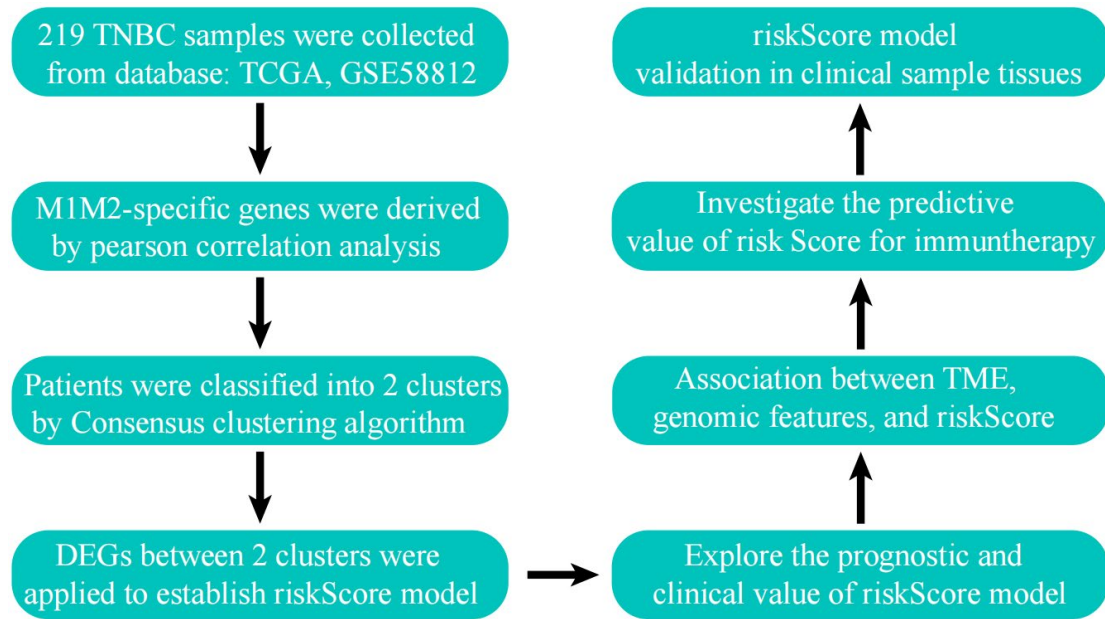

FIGURE S1| The flow chart of this study

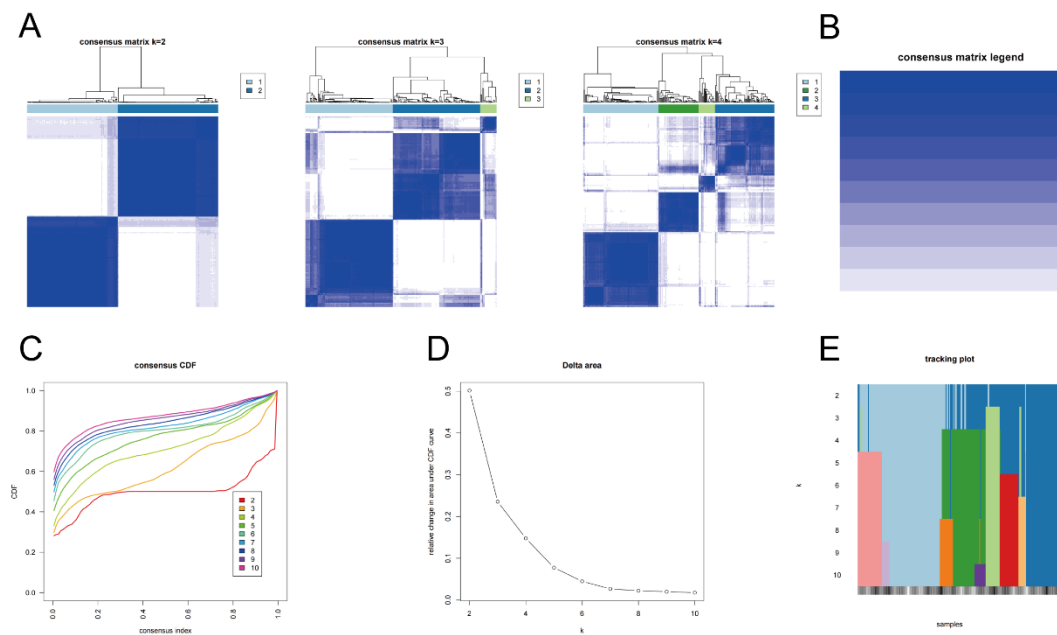

FIGURE S2| The clustering results were most stable when the number of individuals was 2 (K=2).

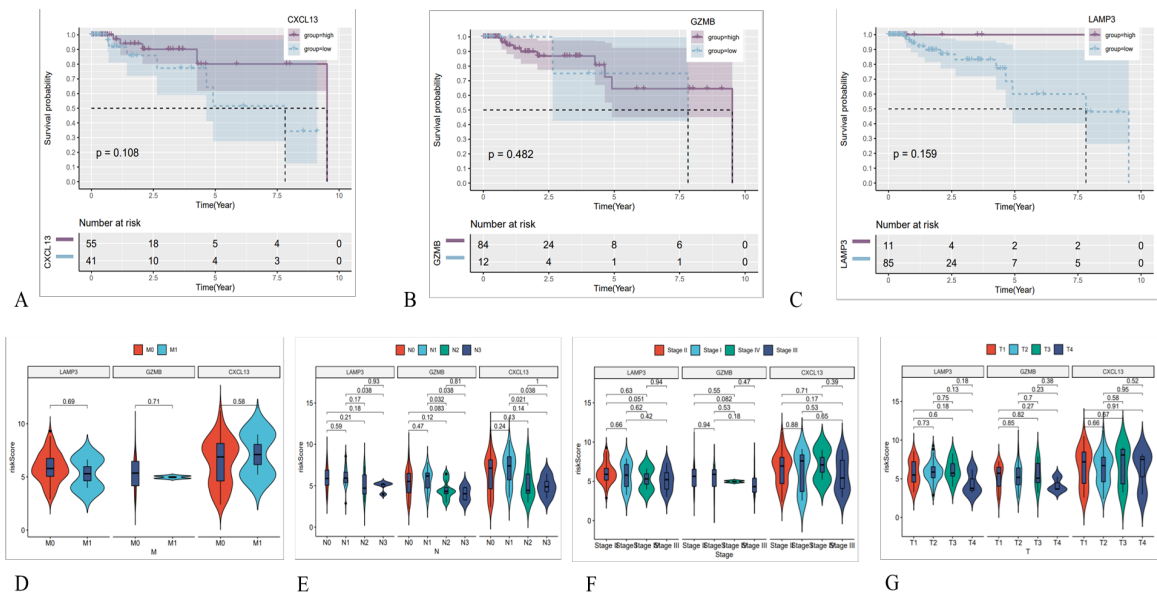

FIGURE S3| (A-C)The clinicopathological correlation of LAMP3, GZMB, and CXCL13 proteins, including survival analysis;(D-G) Expression levels across different T stages, N stages, and overall stages.

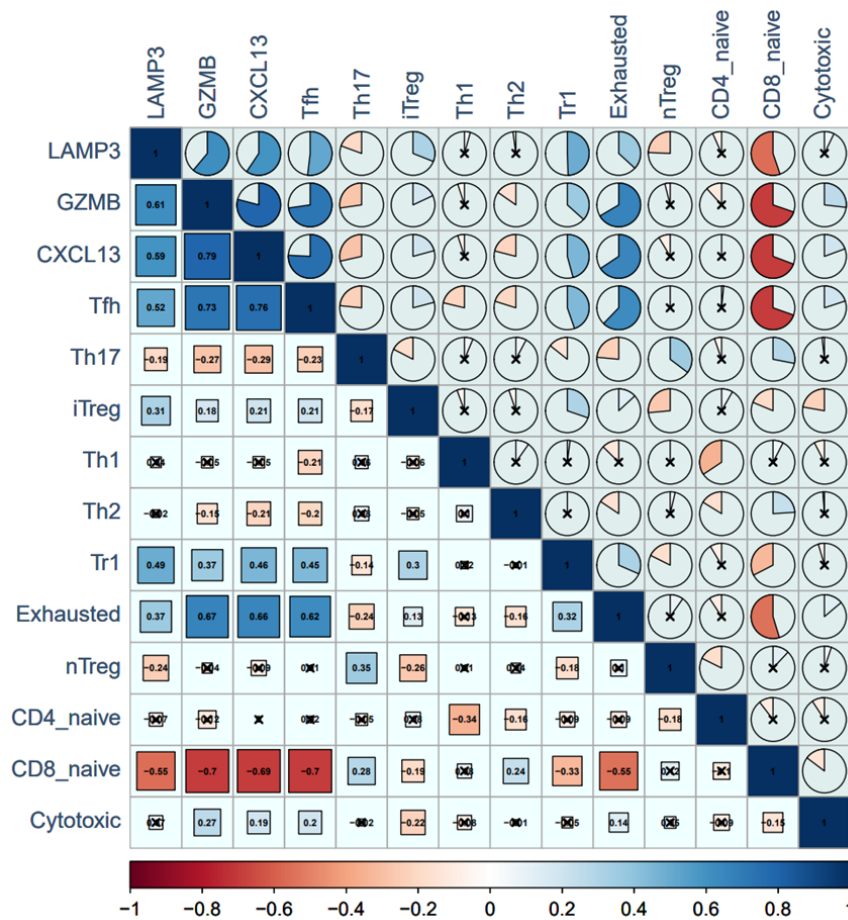

FIGURE S4|Spearman correlation analysis to investigate the relationship between the

expression levels of LAMP3, GZMB, and CXCL13 proteins and the cellular composition of the tumor microenvironment.

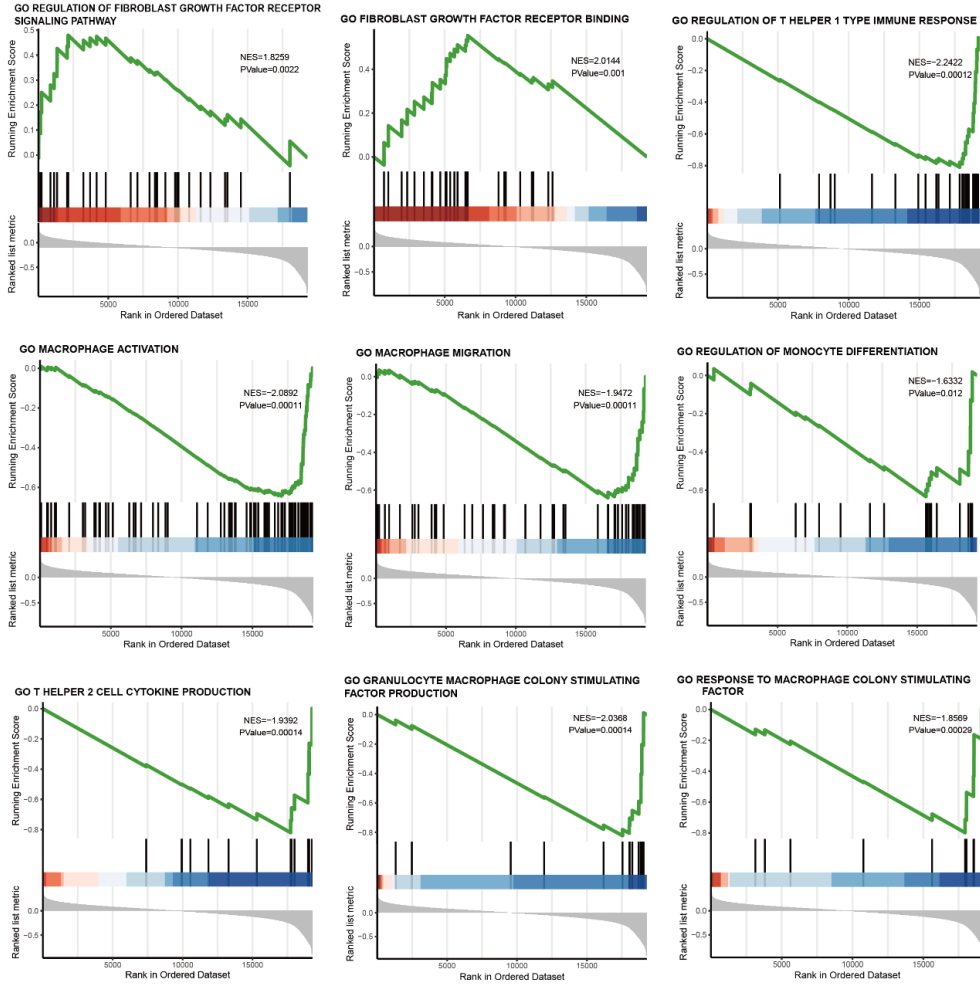

FIGURE S5| GSEA was applied to interpret the gene expression data of TCGA and GEO. The set of genes associated with macrophage activation and migration, GM-CSF production, and monocyte differentiation to TAM was relatively inactive in samples with higher riskScore.

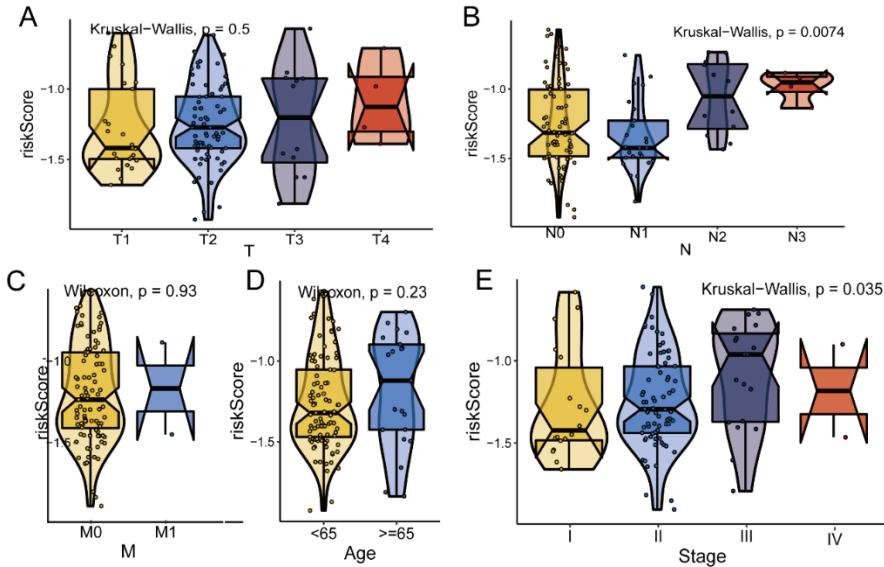

FIGURE S6| The significant differences in the AJCC staging of TNBC. the higher the N grade,

the higher the riskScore(S6B). However, the differences in age(S6D), metastasis(S6C) and T grade (S6A) on riskScore were not statistically significant.

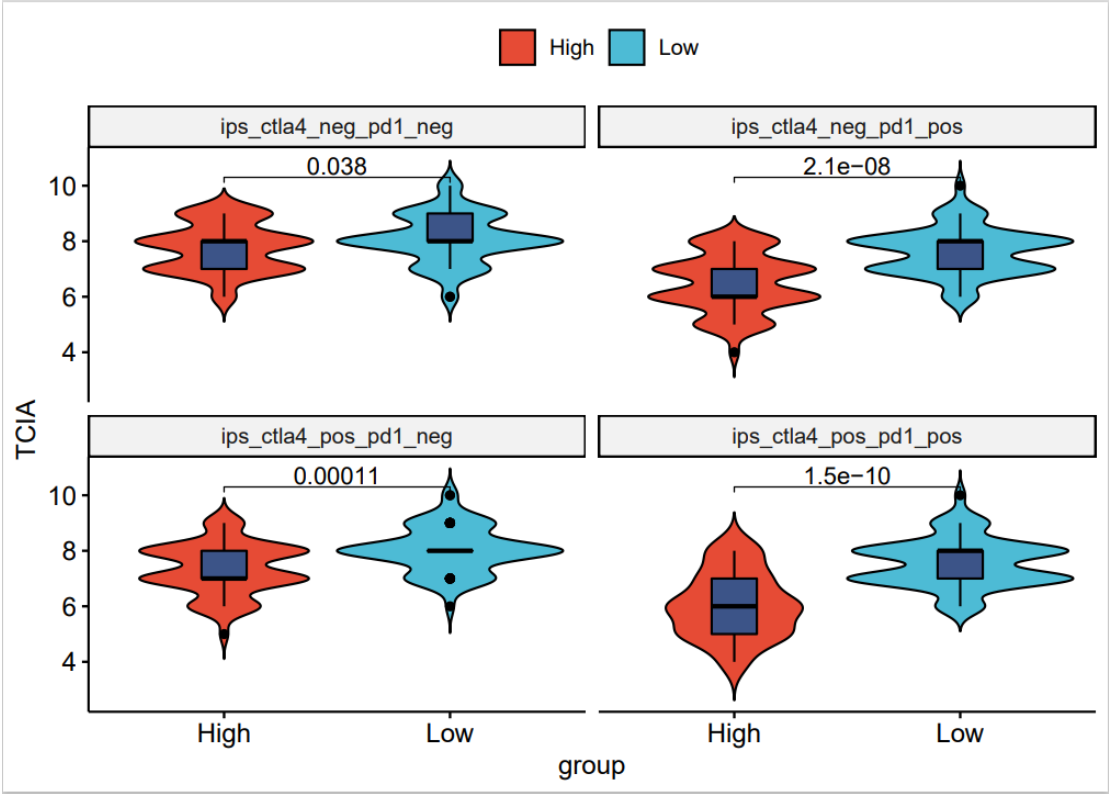

FIGURE S7| TCIA scores was evaluated for patients in the high and low riskScore groups.
